# Supplementary material for: Mesocellular Silica Foam as Immobilization Carrier for Production of Statin Precursors
Source: MDPI journal article supplement (doi:10.3390/ijms25041971), 2024-02-06
Supplement: s1 [file s1]

# Mesocellular Silica Foam as Immobilization Carrier for Production of Statin Precursors

Dino Skendrović <sup>1</sup>, Mateja Primožič <sup>2</sup>, Tonči Rezić <sup>3</sup>, Ana Vrsalović Presečki <sup>1\*</sup>

1 University of Zagreb, Faculty of Chemical Engineering and Technology, 1000 Zagreb, Croatia; dskendrov@fkit.hr (D. S.); avrsalov@fkit.unizg.hr (A.V.P.)

2 Faculty of Chemistry and Chemical Engineering, University of Maribor, Smetanova Ulica 17, 2000 Maribor, Slovenia; mateja.primozic@um.si (M.P.)

3 University of Zagreb, Faculty of Food technology and Biotechnology, Pierottijeva 6, HR-10000 Zagreb, Croatia; trezic@pbf.hr (T.R.)

\* Correspondence: avrsalov@fkit.unizg.hr; Tel.: +385 1 4597 157

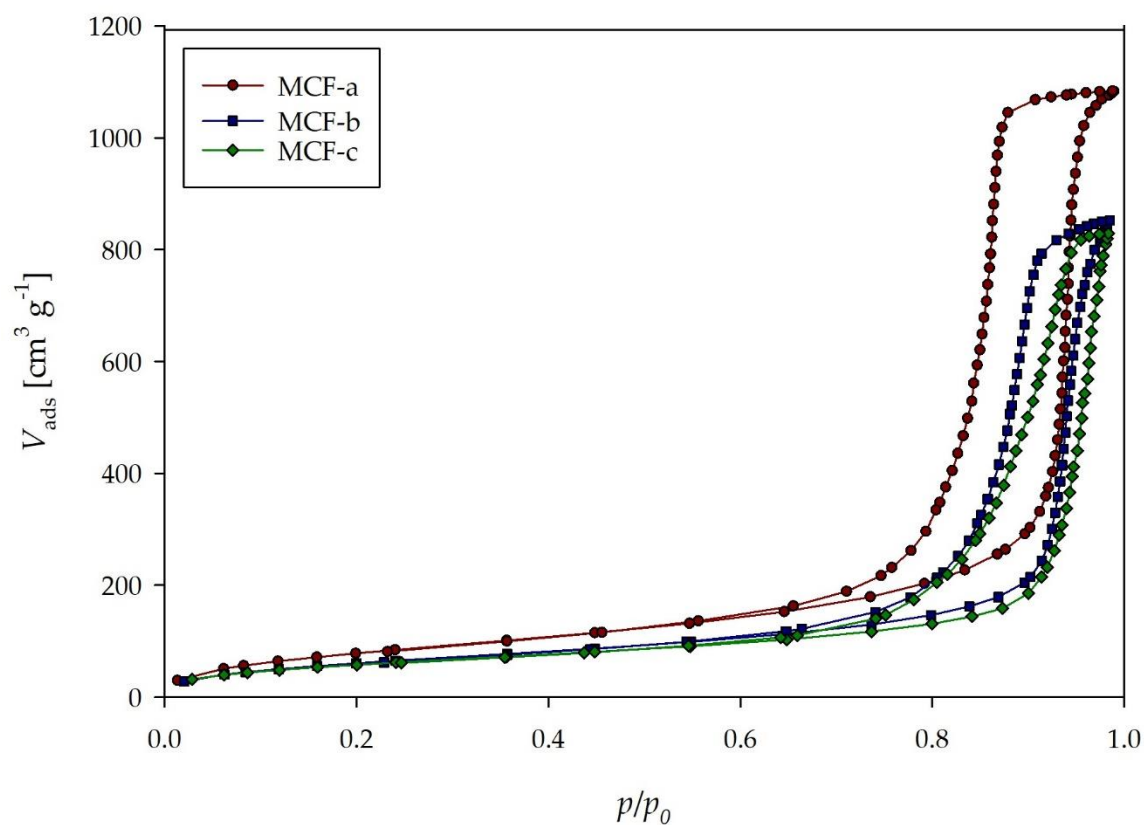

Figure S1. Nitrogen adsorption/desorption isotherms for the MCF carriers.

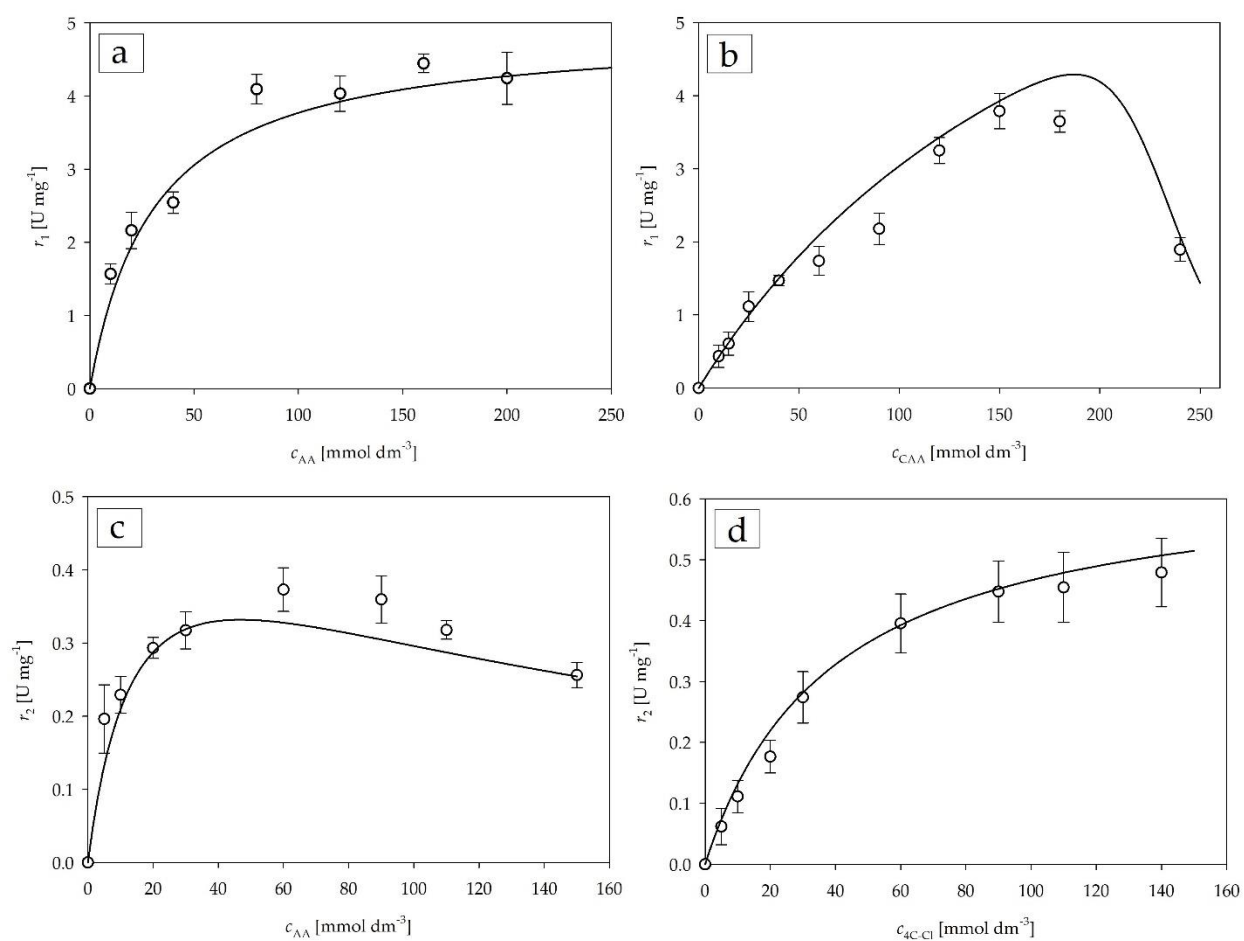

**Figure S2.** Kinetics of DERA immobilized on MCF-a/APTMS/10 % *v/v* succinic anhydride in the reaction of first (a, b) and second (c, d) aldol addition. The influence of: a -acetaldehyde ( $c_{\text{chloroacetaldehyde}} = 100 \text{ mM}$ ), B - chloroacetaldehyde ( $c_{\text{acetaldehyde}} = 100 \text{ mM}$ ), C - acetaldehyde ( $c_{4\text{-chloro-3-hydroxybutanal}} = 5 \text{ mM}$ ) and D - 4-chloro-3-hydroxybutanal ( $c_{\text{acetaldehyde}} = 40 \text{ mM}$ ) concentration on the initial reaction rate (0.1 M phosphate buffer pH 6, 25 °C,  $\gamma_{\text{DERA}} = 1 \text{ mg cm}^{-3}$ ).

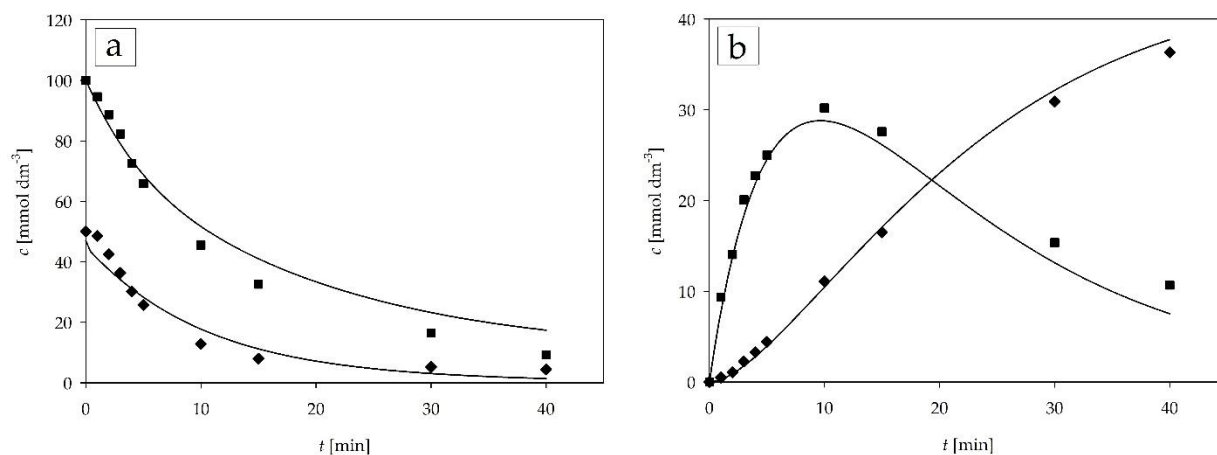

**Figure S3.** Mathematical model validation for double aldol addition reaction catalyzed by DERA<sup>024</sup> immobilized on MCF-a/APTMS/10 % *v/v* succinic anhydride in the batch reactor. Time change of (a) substrate (symbols: diamond – acetaldehyde, square – chloroacetaldehyde) and (b) product (symbols: square - 4-chloro-3-hydroxybutanal, diamond – lactol). ( $C_{\text{acetaldehyde}} = 100 \text{ mM}$ ,  $C_{\text{chloroacetaldehyde}} = 45 \text{ mM}$ , 0.1 M phosphate buffer pH 6, 25 °C,  $\gamma_{\text{DERA}} = 2 \text{ mg cm}^{-3}$ ).
